# Supplementary material
Source: Springer Nature journal article supplement (https://www.springermedizin.de/resource/supplementary/12916_2009_226_MOESM3_ESM.pdf/9599436)
Supplement: MOESM3 [file 9599436]

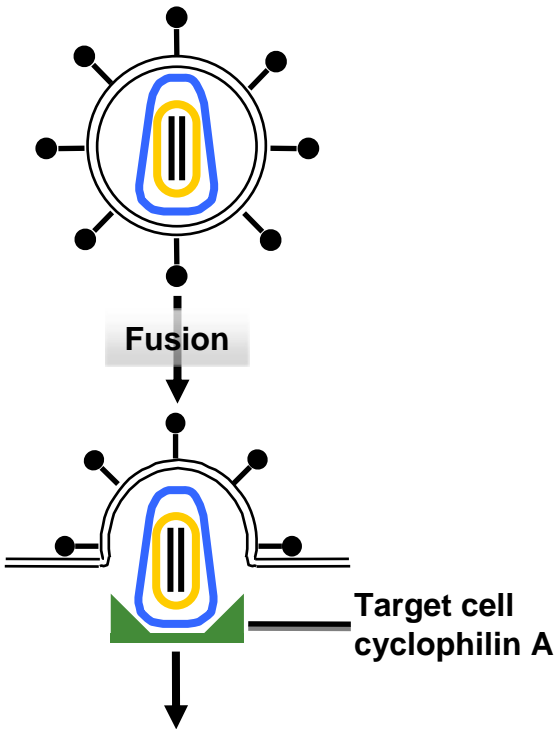

**Cyclophilin A binding to CA  
in the cytoplasm alters  
CA-recognition by restriction  
factors that act between reverse  
transcription and integration**
